# Supplementary material for: Granulin 1 Promotes Retinal Regeneration in Zebrafish
Source: PubMed Central journal article supplement — Invest Ophthalmol Vis Sci. 2018 Dec;59(15):6057–66. doi: 10.1167/iovs.18-24828 (PMC6314112; doi:10.1167/iovs.18-24828), 2018-12
Supplement: iovs-59-13-51_s01.pdf [file iovs-59-13-51_s01.pdf]

# Supplementary information

## Granulin 1 Promotes Retinal Regeneration in Zebrafish

Kazuhiro Tsuruma<sup>1,2</sup>, Yuichi Saito<sup>1</sup>, Hiroyuki Okuyoshi<sup>1</sup>, Akihiro Yamaguchi<sup>1</sup>, Masamitsu Shimazawa<sup>1</sup>, Daniel Goldman<sup>2</sup>, and Hideaki Hara<sup>1\*</sup>

<sup>1</sup>Department of Biofunctional Evaluation, Molecular Pharmacology, Gifu Pharmaceutical University, 1-25-4 Daigaku-nishi, Gifu 501-1196, Japan.

<sup>2</sup>Molecular and Behavioral Neuroscience Institute and Department of Biological Chemistry, University of Michigan, Ann Arbor, MI 48109, USA.

\*Corresponding author: Prof. Hideaki Hara, Ph.D., R.Ph.

Address: Department of Biofunctional Evaluation, Molecular Pharmacology, Gifu Pharmaceutical University, 1-25-4 Daigaku-nishi, Gifu 501-1196, Japan.

Tel./Fax: +81-58-230-8126; E-mail: [hidehara@gifu-pu.ac.jp](mailto:hidehara@gifu-pu.ac.jp)

# Supplementary Figure 1

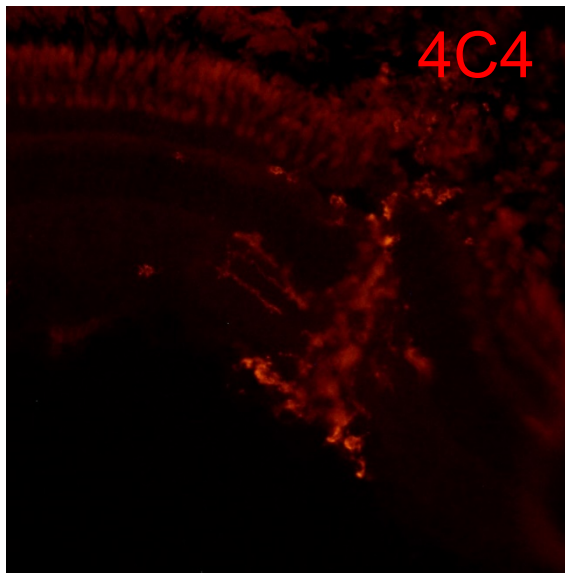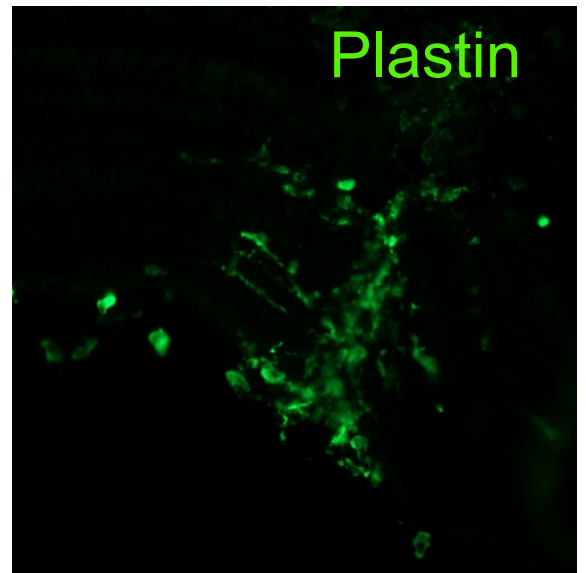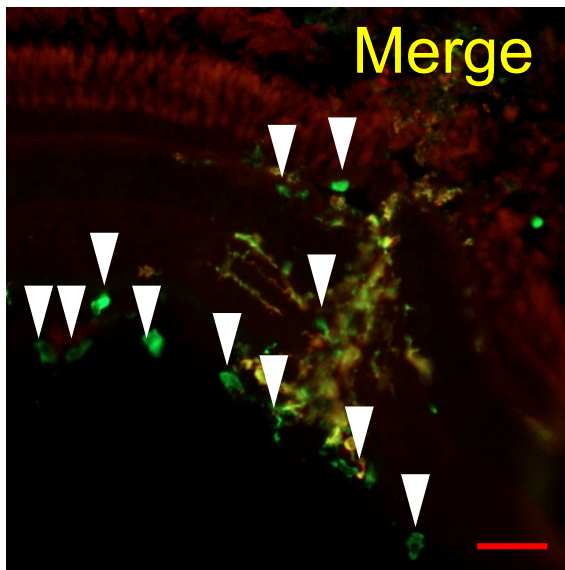

## Supplementary Figure 2

Lissamine/4C4

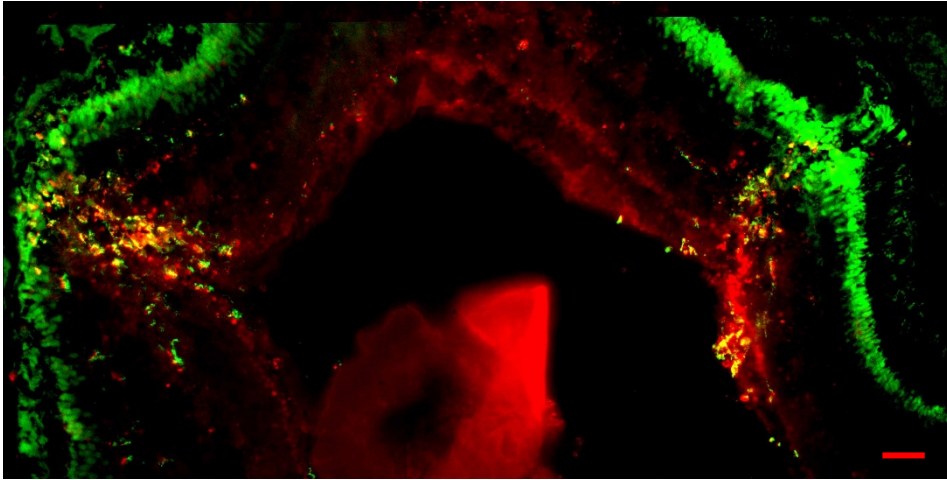

# Supplementary Figure 3

15 h EP

48 h EP

Control

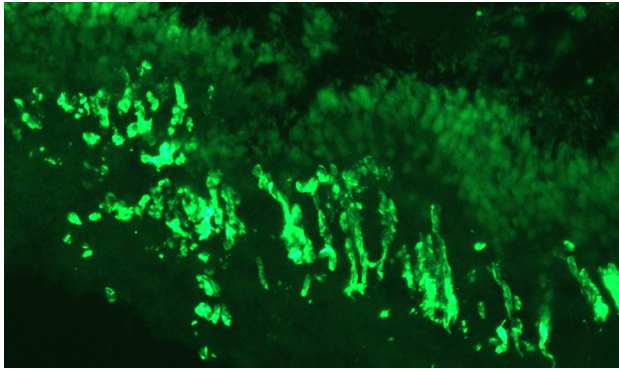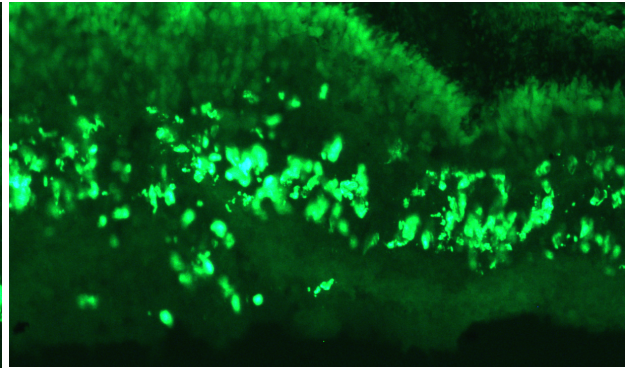

*grn1* MO1

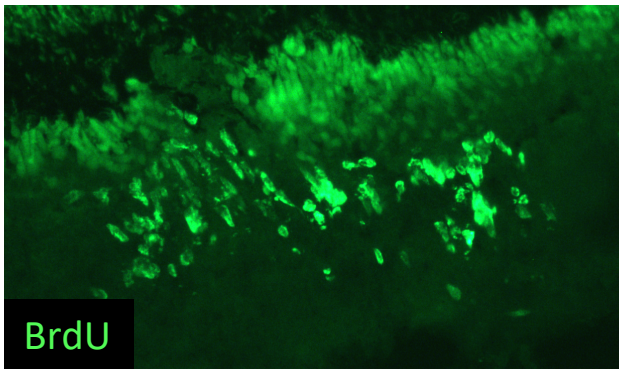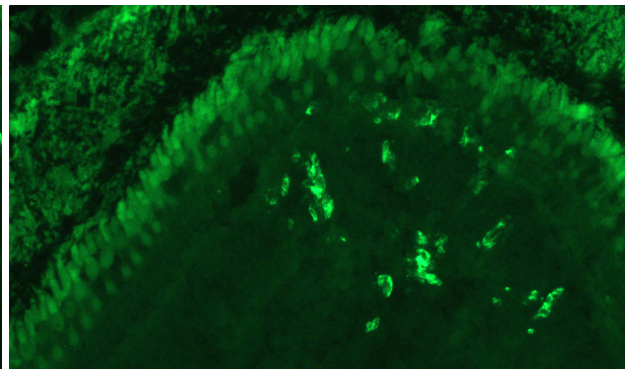

BrdU

Supplementary Figure 4

3 hpi

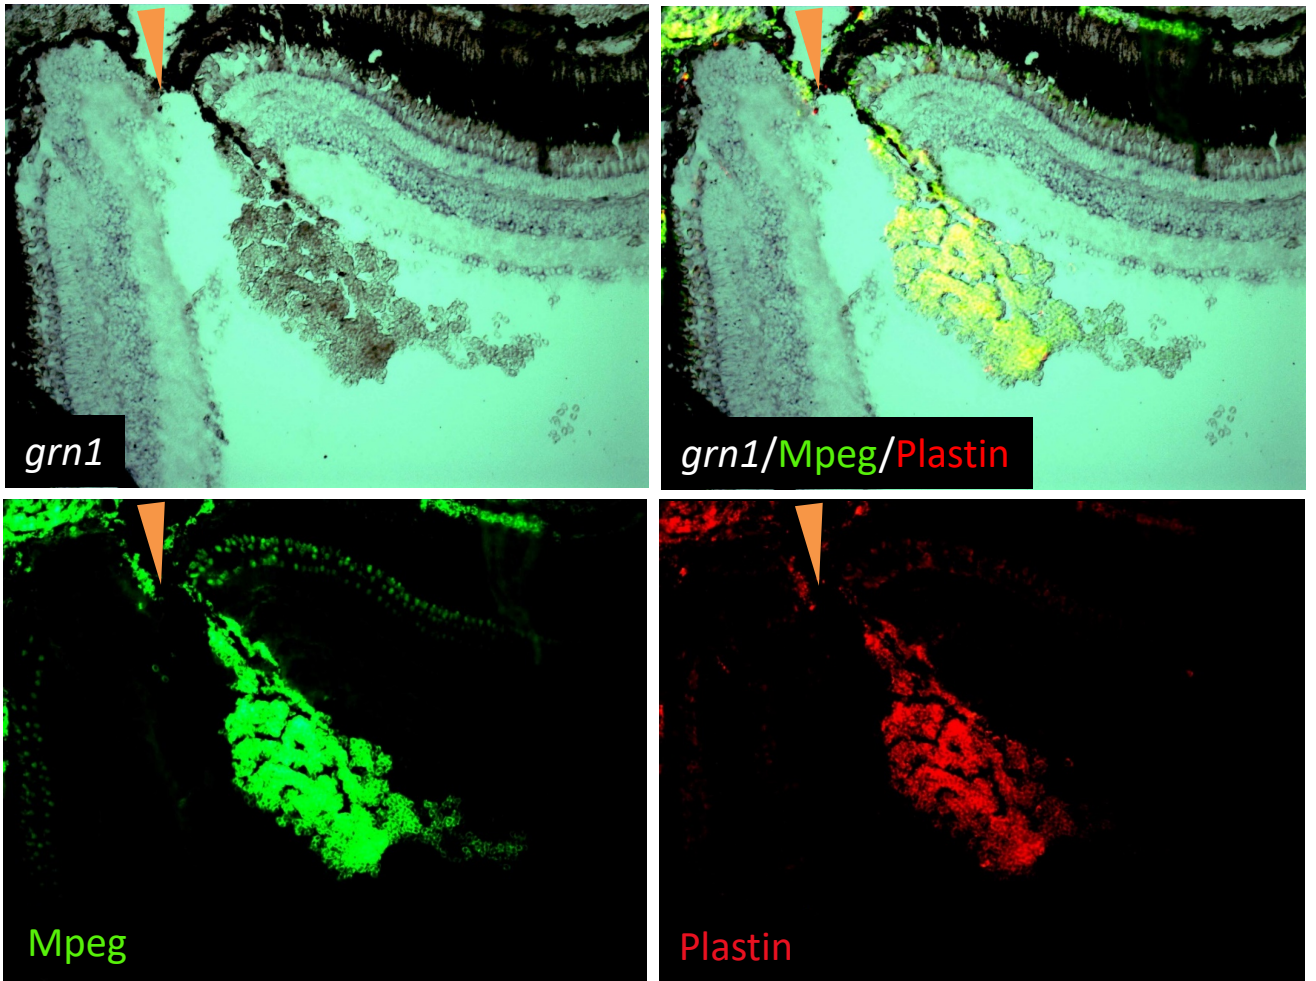

1

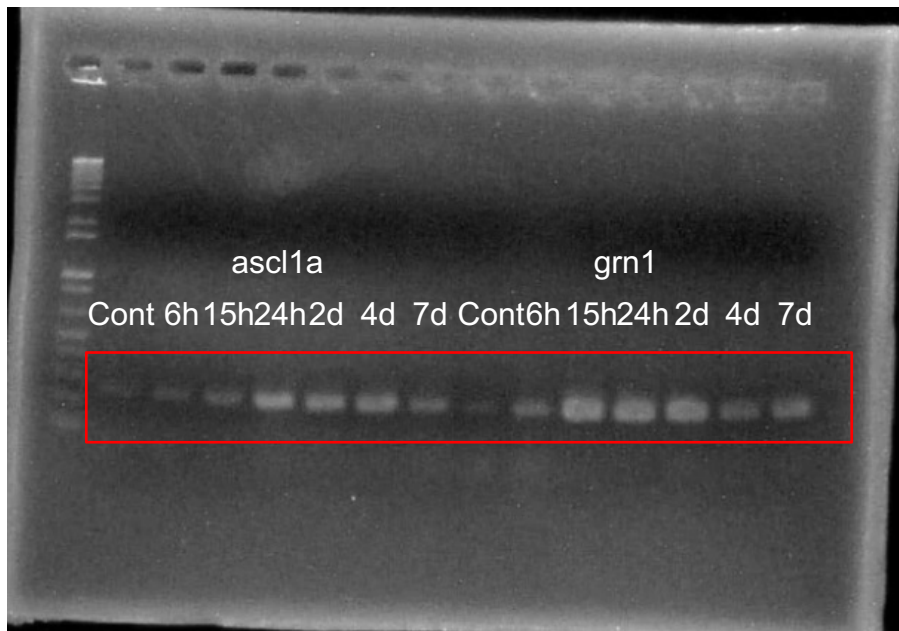

2

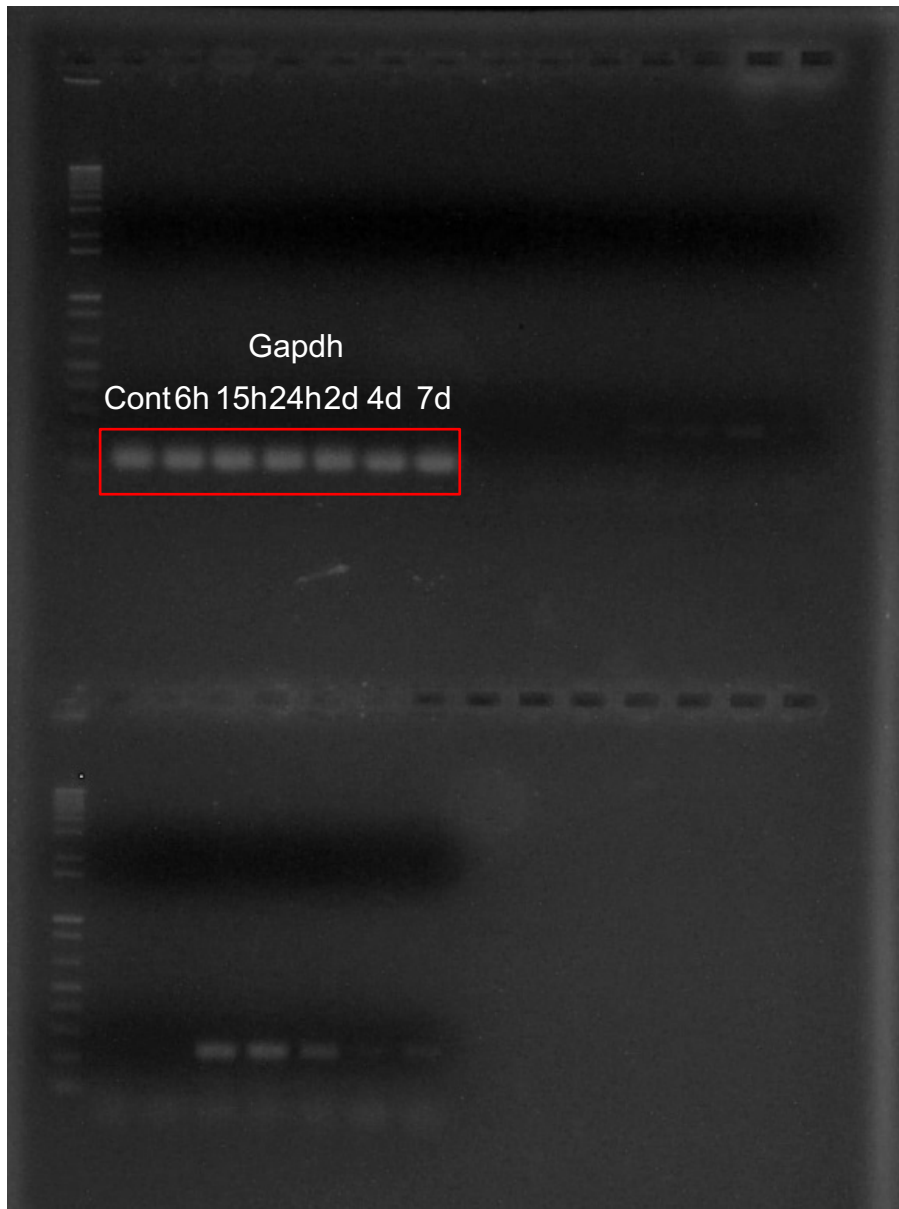

3

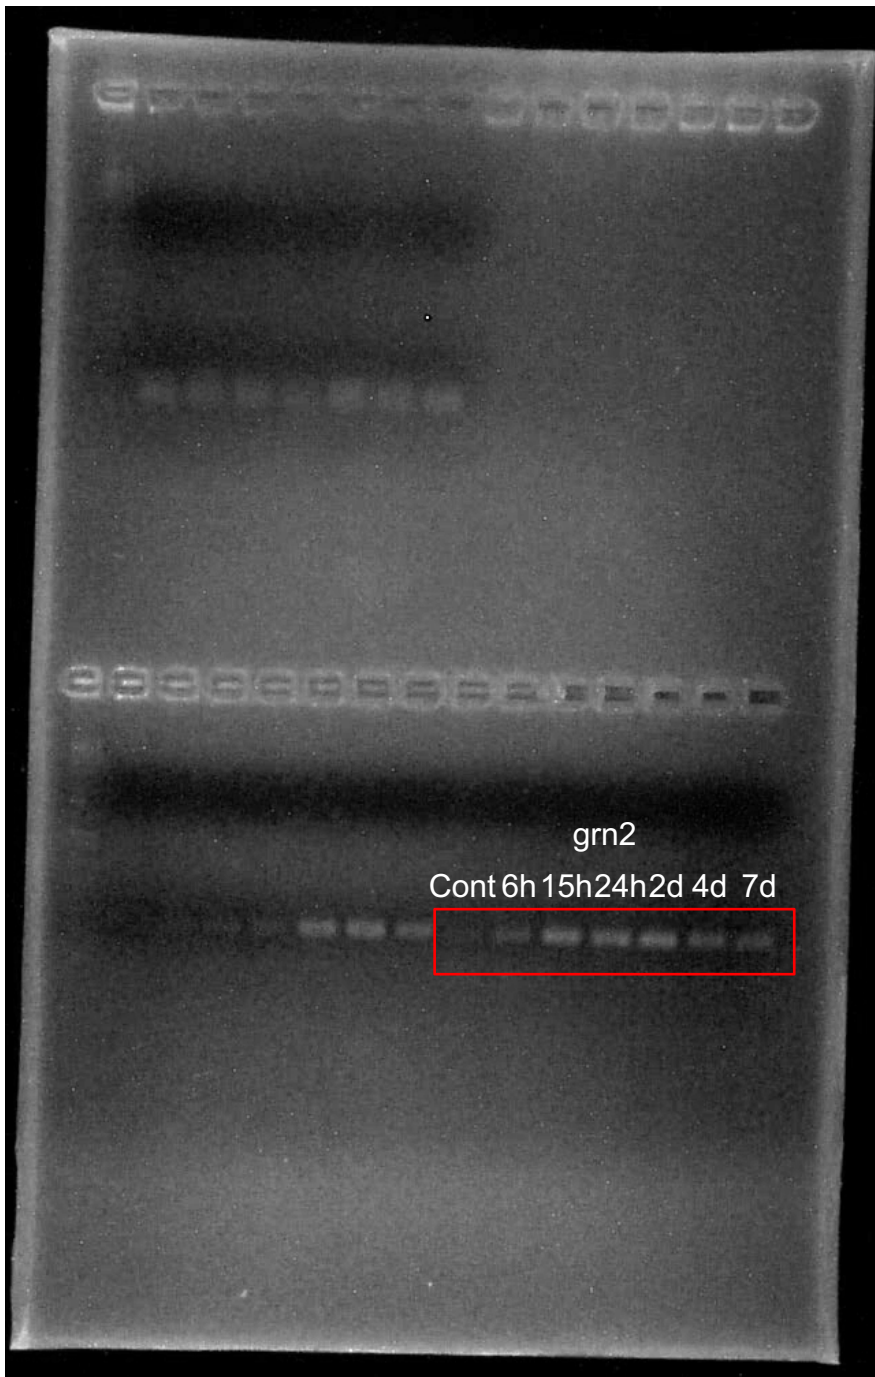

4

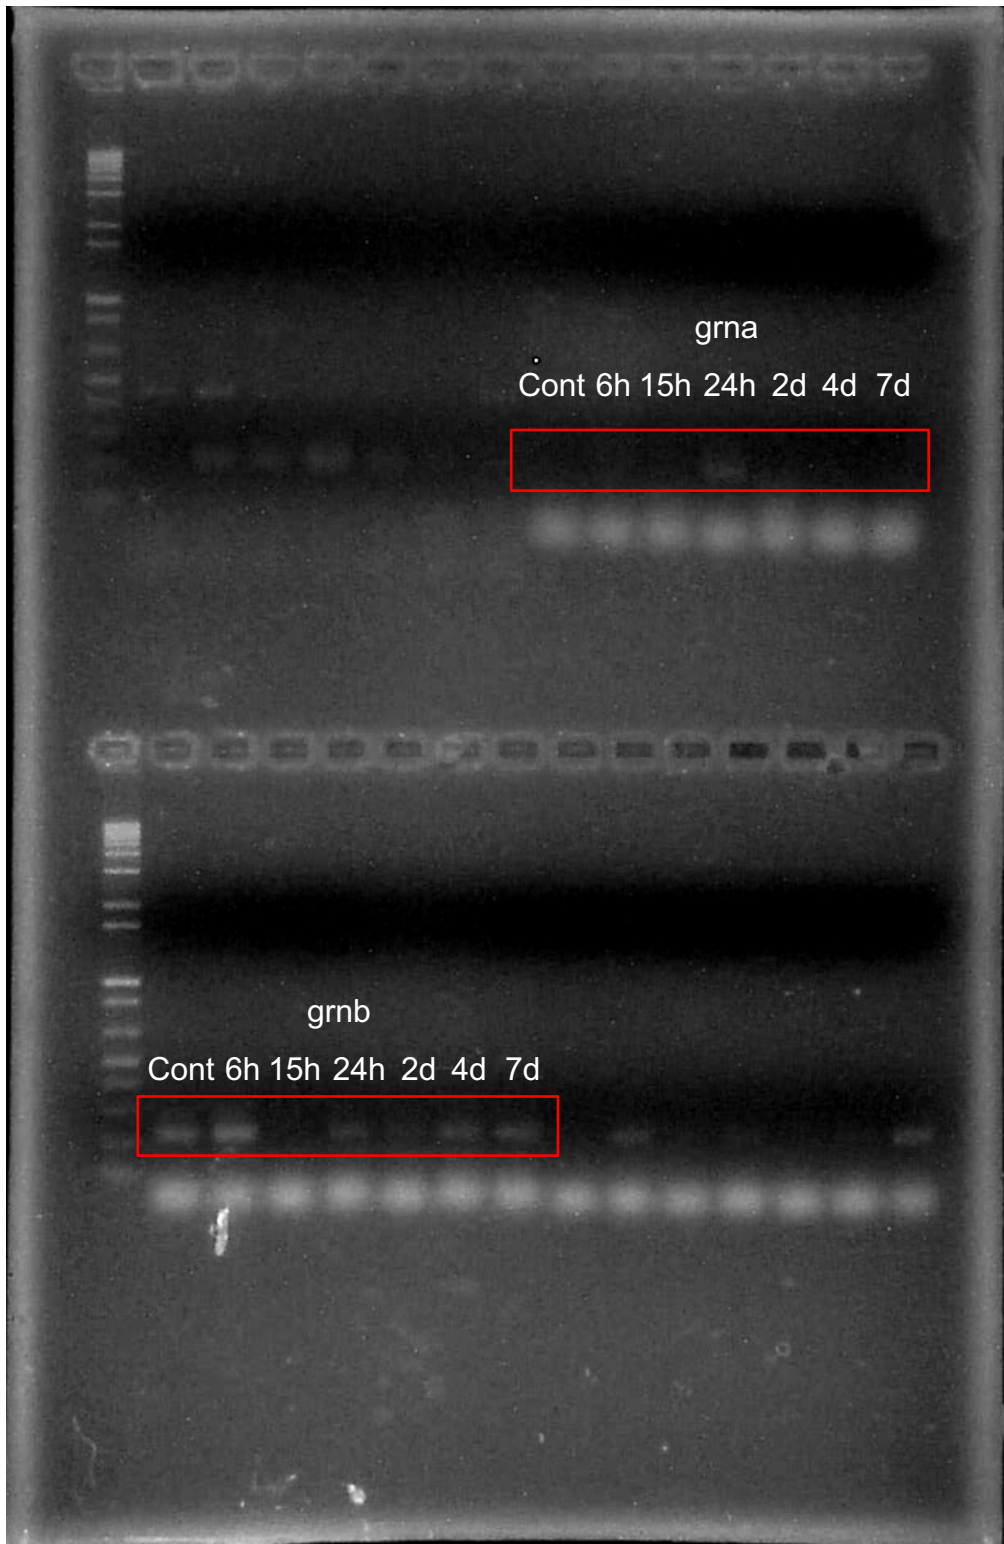



1

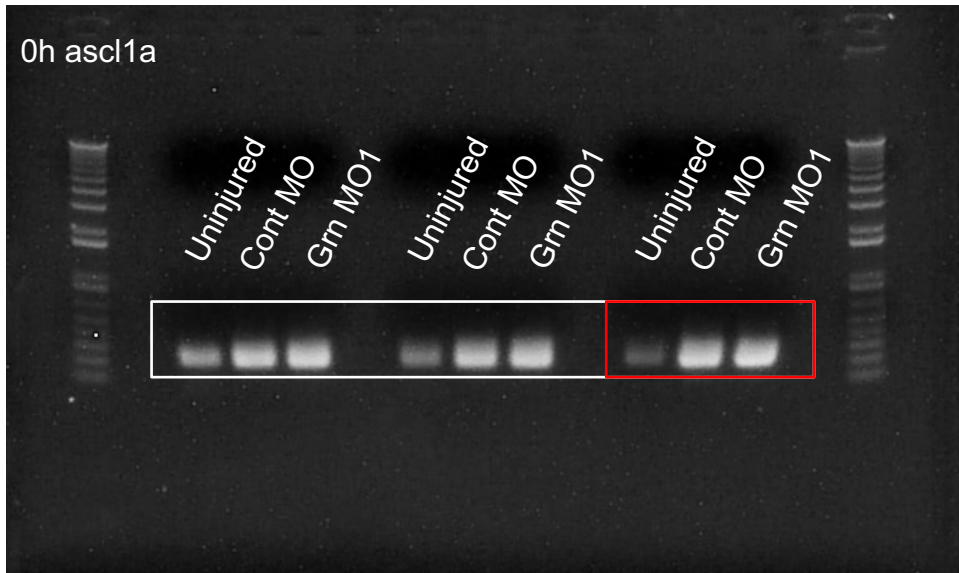

2

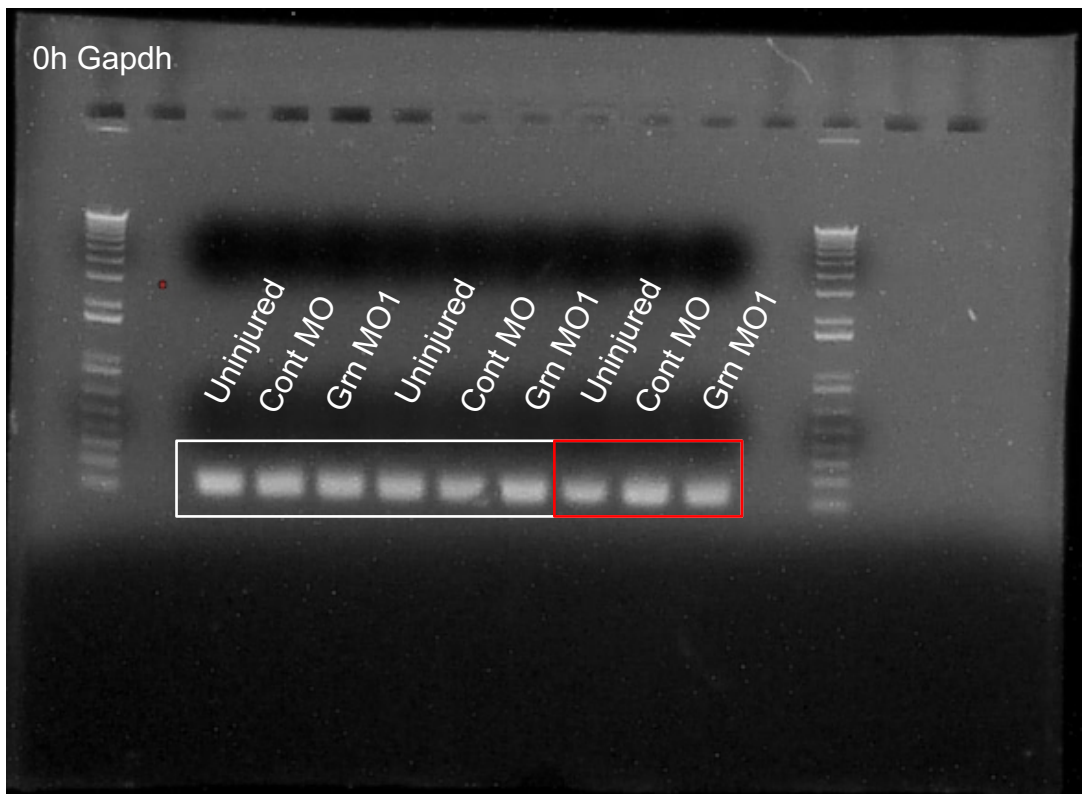

3

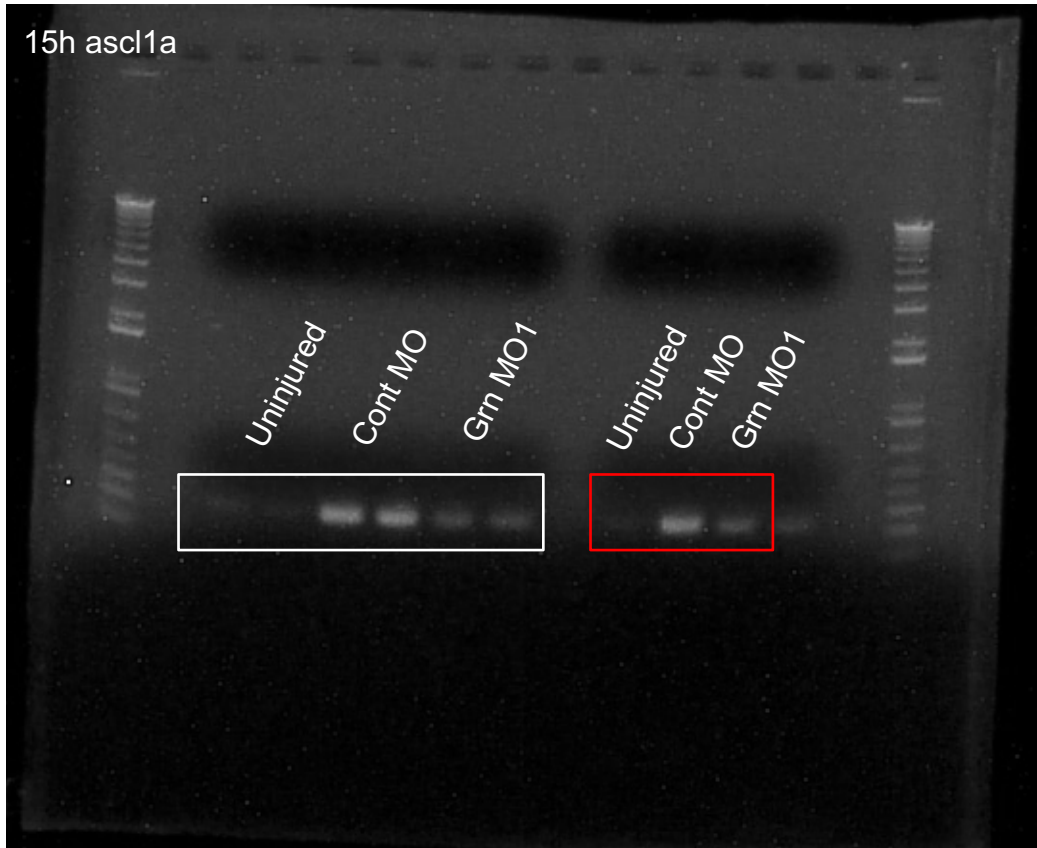

4

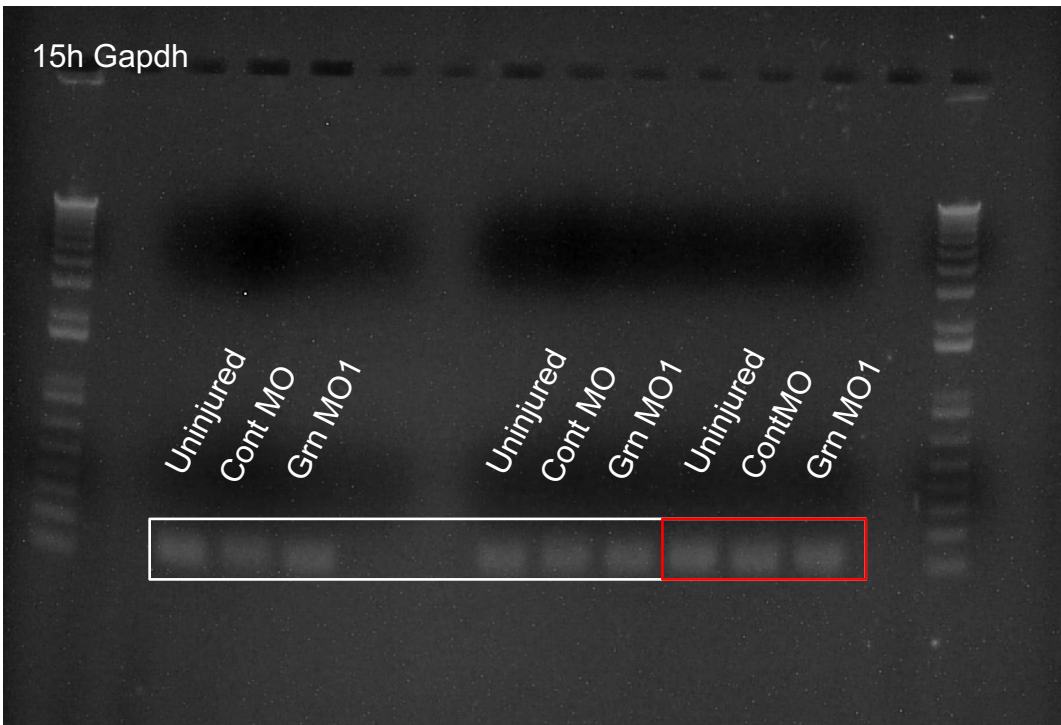

5

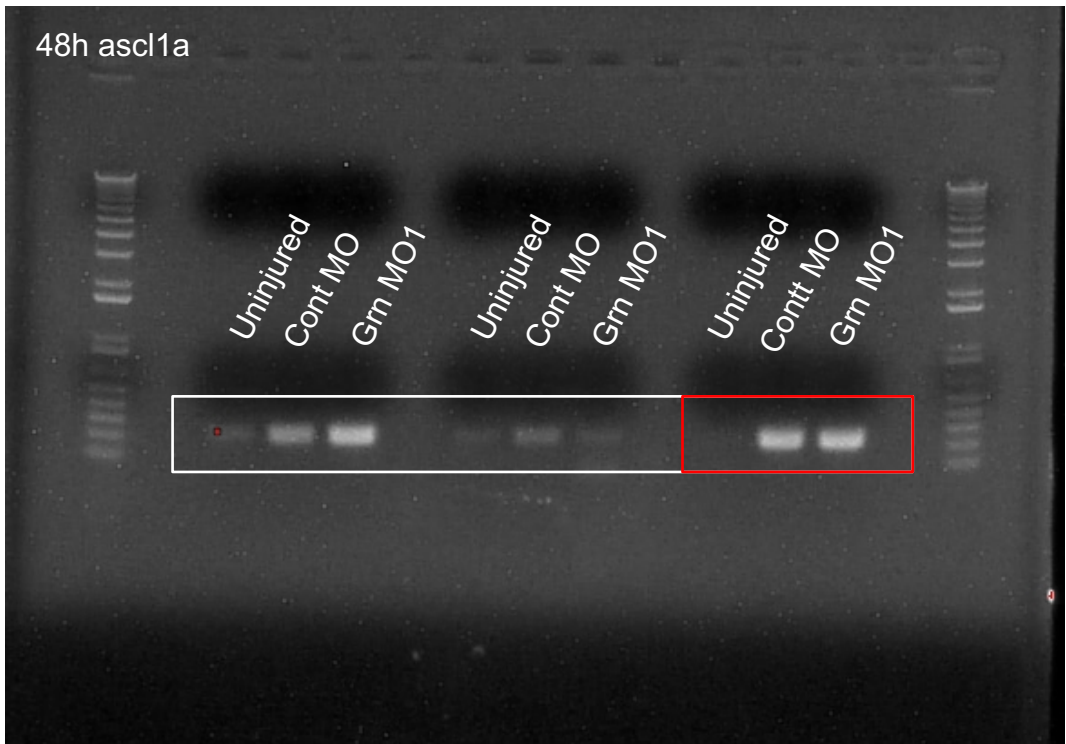

6

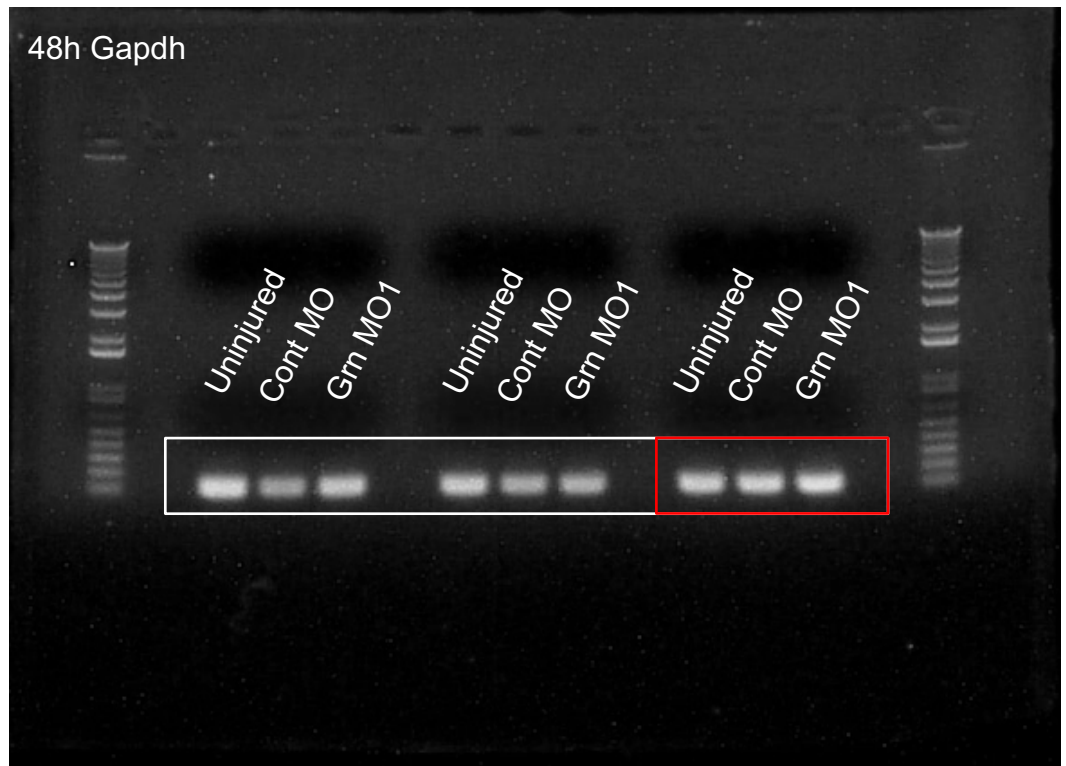

1

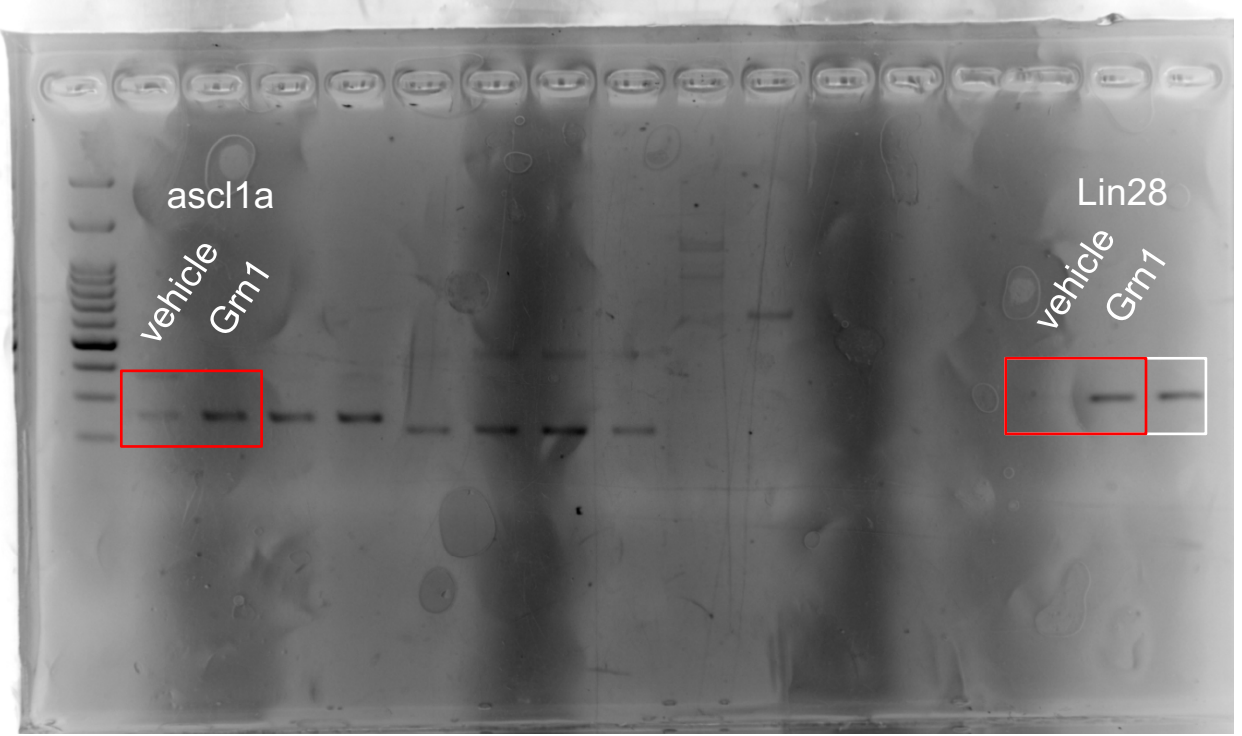

2

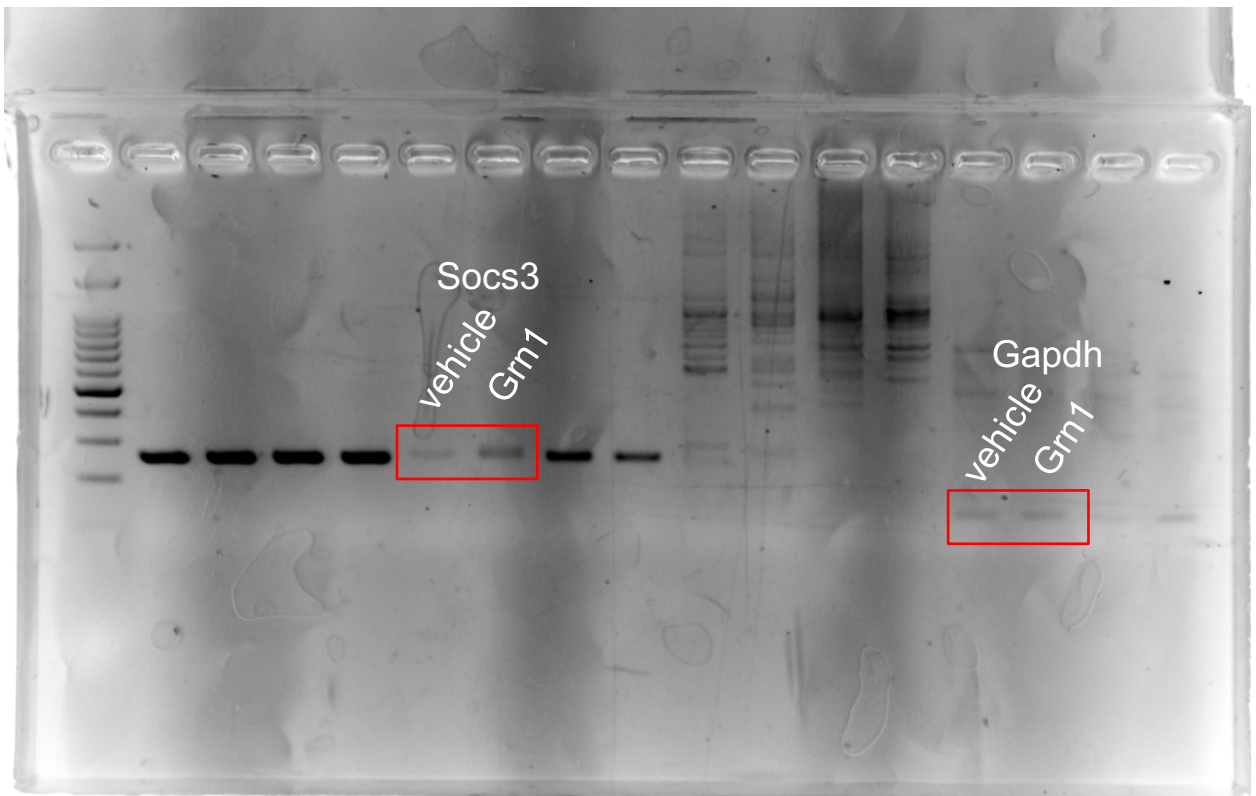

## Supplemental Figure legends

### Figure S1. 4C4-negative, plastin-positive cells are observed at 24 hours post injury

Anti-4C4 and anti-plastin antibody staining at 24 hours post injury. White arrowheads indicate unmerged plastin positive cells which show neutrophils. Scale bar is 100  $\mu\text{m}$ .

### Figure S2. Electroporation of MO into migrating cells

Lissamine-tagged control MO was electroporated at 15 h post injury. The eye was enucleated, fixed, and sectioned. The sections were stained by anti-4C4 antibody. Green shows 4C4-positive infiltrated cells. Red shows MO transduced cells. Merged image indicates MO was transduced into the infiltrated cells. Scale bar is 200  $\mu\text{m}$ .

### Figure S3. Representative images of BrdU positive cells by 15 h or 48 h EP groups

Green shows BrdU positive cells.

### Figure S4. early expressed *grn1* mRNA is not merged with plastin or mpeg.

Triple staining of *in situ* hybridization of *grn1*, plastin (neutrophil or microglia marker), and mpeg (macrophage or microglia marker) at 3 hours post injury (hpi).

The merged area is punctured retinal tissue.

#### **Figure S5 The full-length blots of results by RT-PCR**

Representative blots showing the expression level of *ascl1a*, *grn1*, *grn2*, *grna*, *grnb* and *gapdh*. Red squares in the full-length blots are used for cropped blots in Figure 1.

#### **Figure S6 The full-length blots of results by RT-PCR**

Representative blots showing the expression level of *ascl1a* and *gapdh* at different times. White squares are full-length blots and red squares are used for cropped blots in Figure 3.

#### **Figure S7 The full-length blots of results by RT-PCR**

Representative blots showing the expression level of *ascl1a*, *lin28*, *socs3* and *gapdh*. White squares are full-length blots and red squares are used for cropped blots in Figure 4.
